# Supplementary material for: A T7 exonuclease-assisted cyclic enzymatic amplification method coupled with rolling circle amplification: a dual-amplification strategy for sensitive and selective microRNA detection
Source: Royal Society of Chemistry journal article supplement (doi:10.1039/c3cc48707e), 2013-12-05
Supplement: c3cc48707e.pdf [file c3cc48707e.pdf]

## Supporting Information

### T7 Exonuclease-Assisted Cyclic Enzymatic Amplification Method Coupled With Rolling Circle Amplification: A Dual-Amplification Strategy for Sensitive and Selective MicroRNA Detection

Liang Cui, Zhi Zhu\*, Ninghang Lin, Huimin Zhang, Zhichao Guan and Chaoyong James Yang\*

*State Key Laboratory of Physical Chemistry of Solid Surfaces, Key Laboratory for Chemical Biology of Fujian Province, The MOE Key Laboratory of Spectrochemical Analysis & Instrumentation, Department of Chemical Biology, College of Chemistry and Chemical Engineering, Xiamen University, Xiamen 361005, P. R. China; E-mail: cyyang@xmu.edu.cn, zhuzhi@xmu.edu.cn*

## Experimental Section

### Materials and Reagents

T7 Exonuclease (T7 Exo) was purchased from Affymetrix, Inc. (Santa Clara, CA, USA). CircLigase<sup>TM</sup> ssDNA Ligase was purchased from Epicentre Biotechnologies (Madison, WI, USA). Phi29 DNA polymerase was purchased from New England Biolabs (Beijing, China). Exo III, HPLC-purified padlock probes and miRNAs were purchased from Takara Biotechnology Co. Ltd. (Dalian, China). TaqMan probes, linear molecular beacons (LMBs) and target DNA were synthesized on a PolyGen Column 12 DNA synthesizer (Germany) and all DNA synthesis reagents were purchased from Glen Research (Sterling, VA, USA). All DNA/RNA sequences are listed in Table 1. Total RNA Kit was purchased from Sigma-Aldrich (St. Louis, MO, USA) and was used to extract the total RNA from hepatoma cells and hepatocytes.

### Fluorescence Measurements

Fluorescence measurements were carried out on a RF-5301-PC Fluorescence Spectrophotometer (Shimadzu, Japan). In the time scan mode, excitation and emission wavelengths were set at 490 and 520 nm, respectively, with 5 nm bandwidth. The emission spectra were obtained by exciting the samples at 490 nm and scanning the emission from 500 to 650 nm in steps of 1 nm. The T7 Exo activity experiments were conducted in 20 mM Tris-HCl (pH 7.5) buffer containing 10 mM MgCl<sub>2</sub> and 20 mM NaCl (T7 Exo buffer), and the Exo III activity experiments were conducted in 50 mM Tris-HCl (pH 8.0) buffer containing 5 mM MgCl<sub>2</sub> (Exo III buffer).

### **T7 Exo-Assisted Cyclic Enzymatic Amplification Method**

To test the feasibility of T7 Exo for CEAM, CEAM was carried out in the presence of different concentrations of target cDNA in 10  $\mu$ L T7 Exo buffer (20 mM Tris-HCl, 10 mM MgCl<sub>2</sub> and 20 mM NaCl, pH 7.5) containing T7 Exo (5 U/ $\mu$ L) and TaqMan probes (1  $\mu$ M) for 1 hr at 37°C. After incubation, the samples were diluted to 200  $\mu$ L with T7 Exo buffer and analyzed by spectrofluorometry.

### **RCA-CEAM Dual Amplification Method for Ultrasensitive Detection of miRNA**

First, the padlock probes were ligated and circularized by ssDNA ligase. Then the RCA in the presence of different concentrations of target miRNA was carried out in 10  $\mu$ L phi29 buffer (50 mM Tris-HCl, 10 mM MgCl<sub>2</sub>, 10 mM (NH<sub>4</sub>)<sub>2</sub>SO<sub>4</sub>, 4 mM DTT, pH 7.5) containing circular template (200 nM), phi29 DNA polymerase (1 U/ $\mu$ L), dNTPs (0.25 mM), ribonuclease inhibitor (0.8 U/ $\mu$ L), and BSA (0.25  $\mu$ g/ $\mu$ L) for 6 hr at 30°C. To test the RCA performance, the experiment was carried out by addition of 1 $\times$ SybrGreen before the RCA reaction. After RCA, the samples were diluted to 20  $\mu$ L with addition of 4  $\mu$ L 5 $\times$ T7 Exo buffer, 1  $\mu$ M LMBs, 50 U T7 Exo and then incubated at 37°C for 1 hr. The samples were diluted to 200  $\mu$ L with T7 Exo buffer and analyzed by spectrofluorometry.

### **Gel Electrophoresis for Monitoring T7 Exo Digestion of DNA**

The experiment was carried out with different concentrations of DNA in 10  $\mu$ L T7 Exo buffer (20 mM Tris-HCl, 10 mM MgCl<sub>2</sub> and 20 mM NaCl, pH 7.5) containing T7 Exo (5 U/ $\mu$ L) and TaqMan probes (10  $\mu$ M) for 1 hr at 37 °C. Afterwards, a 20% denaturing polyacrylamide gel was prepared using 1  $\times$  TBE buffer (pH 8.3). The gel was run at 1W power for about 1 hr in 1  $\times$  TBE buffer, stained for 30 min by Stains All solution (500 mL formamide, 100 mL 10  $\times$  TBE, 400 mL H<sub>2</sub>O, 200 mg Stains All), then illuminated with white light until the stained band appeared, and finally photographed with a digital camera.

**Table S1.** Sequences used in this work.<sup>a</sup>

| Name          | Sequence                                                                                                        |
|---------------|-----------------------------------------------------------------------------------------------------------------|
| TaqMan probe  | 5' - Dabcyl - AACTATA CAA CCTAC – FAM- 3'                                                                       |
| Target cDNA   | 5' - TGA GGT AGT AGG TTG TAT AGT TTT AGT A - 3'                                                                 |
| 1mDNA         | 5' - TGA GGT AGT AGG <u>TTC</u> TAT AGT TTT AGT A - 3'                                                          |
| 3mDNA         | 5' - TGA GGT AGT AGG <u>TCC</u> <u>GAT</u> AGT TTT AGT A -3'                                                    |
| Padlock probe | 5' - PO <sub>4</sub> - CTA CTA CCT C AT TTG CAT TTC AGT TTA CGG TTT AGC ATT TCG CAA TTT TAA CTA<br>TAC AAC - 3' |
| LMBs          | 5' - FAM- AT (Dabcyl) T TGC ATT TCA GTT TAC GGT - 3'                                                            |
| Let 7a        | 5' - UGA GGU AGU AGG UUG UAU AGU U - 3'                                                                         |
| Let 7e        | 5' - UGA GGU AGG <u>AGG</u> UUG UAU AGU - 3'                                                                    |
| Let 7f        | 5' - UGA GGU AGU AG <u>A</u> UUG UAU AGU U - 3'                                                                 |
| Mir 122       | 5' - UGG AGU GUG ACA AUG GUG UUU G - 3'                                                                         |

<sup>a</sup> Underlined letters represent the mismatched site

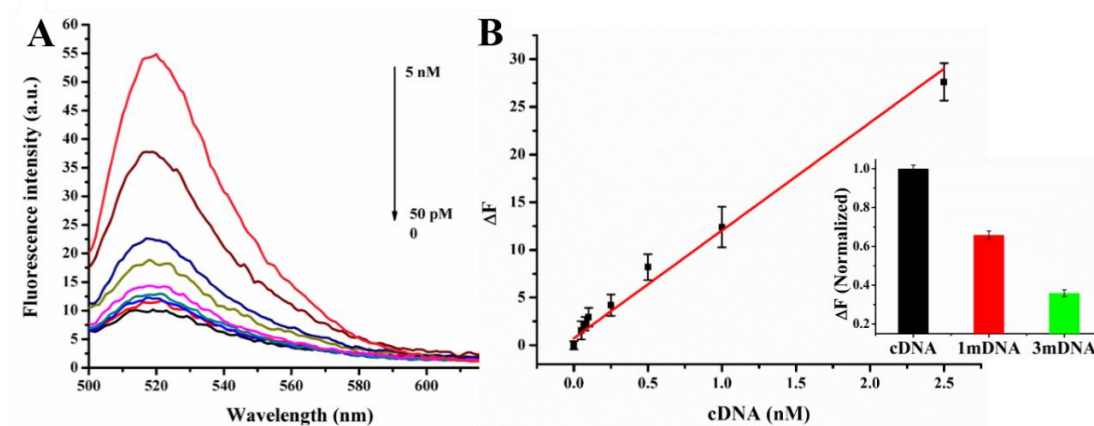

**Fig. S1** (A) Detection of different concentrations (0, 50 pM, 75 pM, 100 pM, 250 pM, 500 pM, 1 nM, 2.5 nM, 5 nM) of target cDNA based on T7 Exo-assisted CEAM. (B) The relationship of the rate of fluorescence enhancement with target cDNA concentration. CEAM can differentiate the perfectly matched and mismatched DNA targets (insert of B, concentration: 2.5 nM).

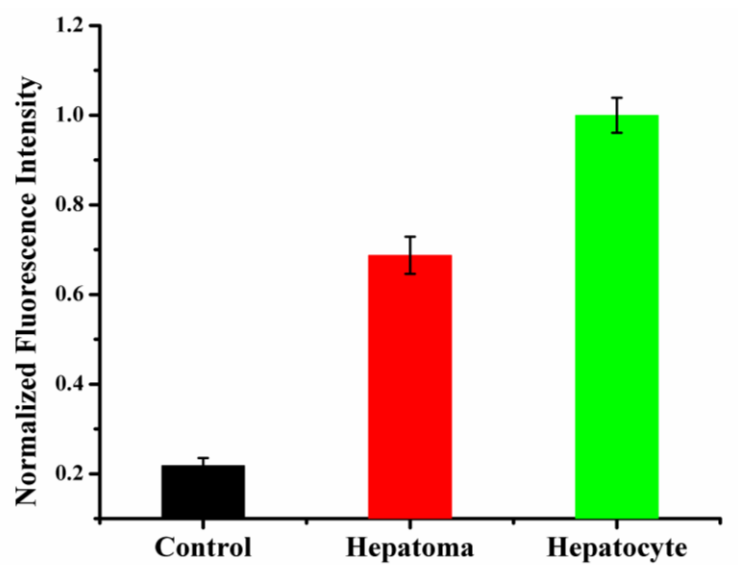

**Fig. S2** The expression levels of let 7a in total RNA samples from hepatocytes and hepatoma cells. The “Control” is the background signal without RNA sample.
